# Supplementary material for: Optimization of culture conditions for the derivation and propagation of baboon (Papio anubis) induced pluripotent stem cells
Source: PubMed Central journal article supplement (PMC5832232; doi:10.1371/journal.pone.0193195), 2018-03-01

Trilineage differentiation of Baboon iPSCs

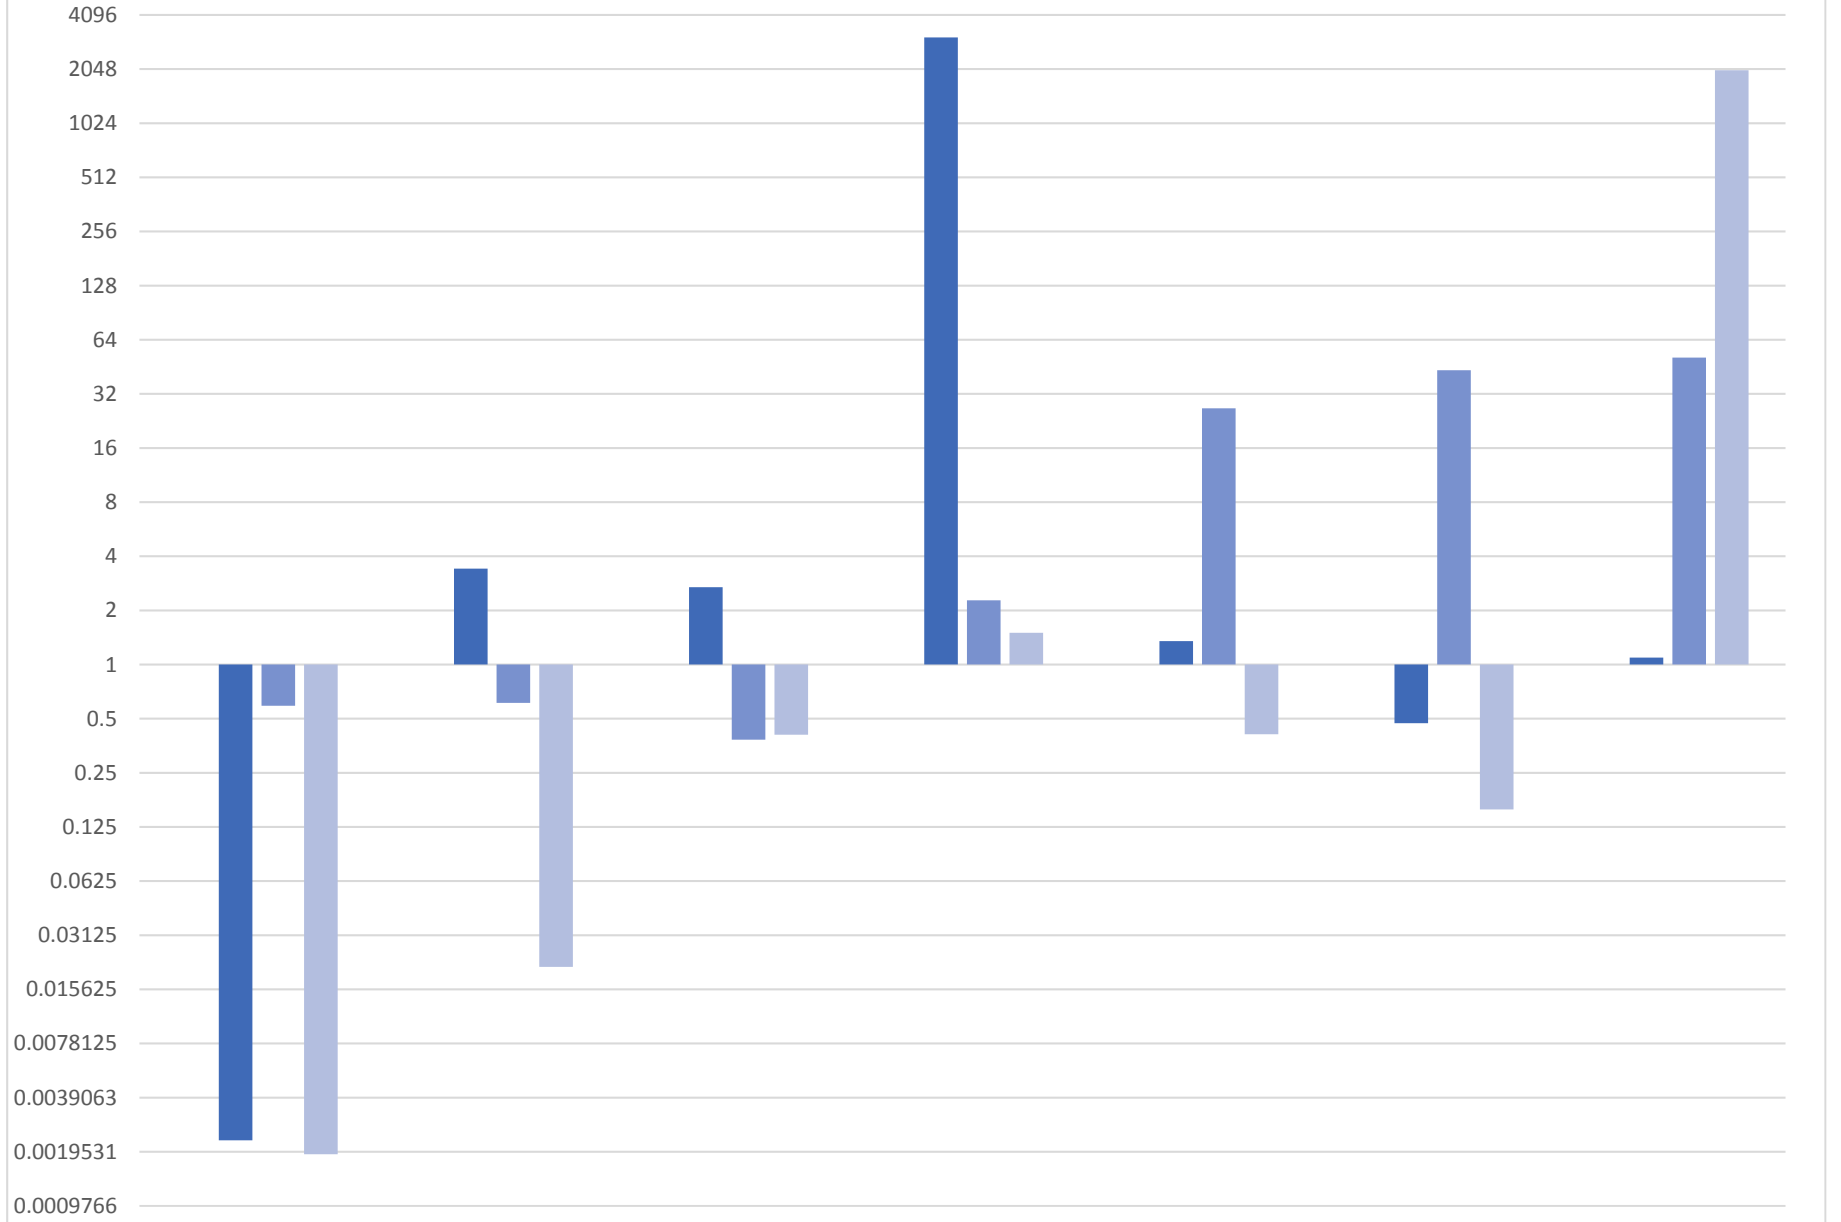

Supplement: pone.0193195.s002.pdf [file pone.0193195.s002.pdf]
