# Supplementary material for: Optimization of culture conditions for the derivation and propagation of baboon (Papio anubis) induced pluripotent stem cells
Source: PubMed Central journal article supplement (PMC5832232; doi:10.1371/journal.pone.0193195), 2018-03-01
Supplement: pone.0193195.s003.pdf [file pone.0193195.s003.pdf]

**S1 Table. Antibodies and dilutions.**

| Target | Company                     | Product Number | Dilution |
|--------|-----------------------------|----------------|----------|
| OCT4   | Sant Cruz Biotechnology     | sc-5279        | 1:100    |
| NANOG  | Abcam                       | ab2163         | 1:150    |
| SOX2   | Cell Signaling Technologies | 3579           | 1:400    |
| SSEA4  | Sant Cruz Biotechnology     | sc-21704       | 1:5      |
| TRA181 | Sant Cruz Biotechnology     | sc-21706       | 1:5      |
