# Supplementary material for: Optimization of culture conditions for the derivation and propagation of baboon (Papio anubis) induced pluripotent stem cells
Source: PubMed Central journal article supplement (PMC5832232; doi:10.1371/journal.pone.0193195), 2018-03-01
Supplement: pone.0193195.s004.pdf [file pone.0193195.s004.pdf]

**S2 Table. PCR primers.**

| Gene  | Forward                 | Reverse                  |
|-------|-------------------------|--------------------------|
| B2M   | CTTTCTGGCCTGGAGGCTATC   | GGCTTTCCATTCTCTGGTGGA    |
| OCT4  | AGGAGAAGCTGGAGCAAACC    | TGGCTGAACACCTCCCAAATA    |
| NANOG | TGAGATGCCTCACACGGAG     | GCTGGGCAGAAGAGAACACA     |
| SOX2  | GTTACGCGCATATGAACGGC    | CGAGCTGGTCATGGAGTTGT     |
| NES   | AGCGTTGGAACAGAGGTTGG    | CACAGCCAGCTGGAACCTTTC    |
| PAX6  | CTAATGGGCCAGTGAGGAGC    | TTCTCAGATTCCTATGCTGATTGG |
| SOX17 | GTGGACCGCACGGAATTC      | GGAGATTCACACTGGAGTCA     |
| FOXA2 | CGGTCACGAACAAAACGGG     | AGAGGAGTTCATAATGGGCCG    |
| T     | CCTTGATGCAAAGGAAAGAAGCG | TCCAGGAAGAAACCACCCCC     |
