# Supplementary material for: Optimization of culture conditions for the derivation and propagation of baboon (Papio anubis) induced pluripotent stem cells
Source: PubMed Central journal article supplement (PMC5832232; doi:10.1371/journal.pone.0193195), 2018-03-01
Supplement: pone.0193195.s005.pdf [file pone.0193195.s005.pdf]

**S3 Table. Media constituents.**

| Media | mTeSR-1          | TeSR-E8                                           | Pluristem*             | ReproFF |
|-------|------------------|---------------------------------------------------|------------------------|---------|
|       | DMEM/F12         | DMEM/F12                                          | DMEM/F12               | ?       |
|       | NaHCO3           | NaHCO3 (543 mg/L)                                 |                        | ?       |
|       | I-Ascorbic Acid  | I-Ascorbic Acid-2-phosphate<br>magnesium (64mg/L) |                        | ?       |
|       | Selenium         | Sodium Selenium (14 ug/L)                         | Selenium               | ?       |
|       | Transferrin      | Transferrin (10.7 mg/L)                           | Transferrin            | ?       |
|       | Insulin          | Insulin (19.4 ug/ml)                              | Insulin                | ?       |
|       | FGF-2            | FGF-2 (100 ug/L)                                  | FGF-2 (10 ug/L)        | ?       |
|       | TGF-B            | TGF-B (2 ug/L)                                    | TGF-B (0.5 ug/L)       | ?       |
|       | BSA              |                                                   |                        | ?       |
|       | Glutathione      |                                                   |                        | ?       |
|       | Trace elements   |                                                   |                        | ?       |
|       | BME              |                                                   |                        | ?       |
|       | Pipicolinic Acid |                                                   |                        | ?       |
|       | GABA             |                                                   |                        | ?       |
|       | Lithium Chloride |                                                   |                        | ?       |
|       | Defined Lipids   |                                                   | Defined Lipids (1x)    | ?       |
|       |                  |                                                   | Dorsomorphin (50 nM)   | ?       |
|       |                  |                                                   | Activin A (2.5-5 ug/L) | ?       |
|       |                  |                                                   | HSA (0.1%)             | ?       |
|       |                  |                                                   | Glutamine (2mM)        | ?       |

known component and concentration

known component

\*Likely components
