# Supplementary material for: Optimization of culture conditions for the derivation and propagation of baboon (Papio anubis) induced pluripotent stem cells
Source: PubMed Central journal article supplement (PMC5832232; doi:10.1371/journal.pone.0193195), 2018-03-01
Supplement: pone.0193195.s006.pdf [file pone.0193195.s006.pdf]

**S4 Table. Ct values for Fig 3.**

**Conditioned Media Baseline**

|        | B2M   | OCT4  | NANOG | SOX2  |
|--------|-------|-------|-------|-------|
| Expt 1 | 17.86 | 17.12 | 18.15 | 20.72 |
| Expt 2 | 17.98 | 17.45 | 18.64 | 21.32 |
| Expt 3 | 17.49 | 16.95 | 18.43 | 20.51 |
| Expt 4 | 18.07 | 18.02 | 18.5  | 21.67 |

**Pluristem**

|        | B2M   | OCT4  | NANOG | SOX2  |
|--------|-------|-------|-------|-------|
| Expt 1 | 18.52 | 18.05 | 18.89 | 21.1  |
| Expt 2 | 18.62 | 17.68 | 19.23 | 20.81 |
| Expt 3 | 18.82 | 17.47 | 19.27 | 21.39 |
| Expt 4 | 18.05 | 17.92 | 18.22 | 20.54 |
