# Supplementary material for: Optimization of culture conditions for the derivation and propagation of baboon (Papio anubis) induced pluripotent stem cells
Source: PubMed Central journal article supplement (PMC5832232; doi:10.1371/journal.pone.0193195), 2018-03-01
Supplement: pone.0193195.s007.pdf [file pone.0193195.s007.pdf]

**S5 Table. Absence of persistent Sendai virus in baboon iPSCs**

| Sample                  | Average Ct |
|-------------------------|------------|
| <b>Positive Control</b> |            |
| HPRT1                   | 23.88      |
| SEV                     | 15.93      |
| KOS                     | 26.42      |
| CMYK                    | 22.94      |
| KLF4                    | 22.03      |
| <b>Baboon iPSC</b>      |            |
| HPRT1                   | 19.63      |
| SEV                     | N.D.       |
| KOS                     | N.D.       |
| CMYK                    | N.D.       |
| KLF4                    | N.D.       |
| <b>No Template</b>      |            |
| HPRT1                   | N.D.       |
| SEV                     | N.D.       |
| KOS                     | N.D.       |
| CMYK                    | N.D.       |
| KLF4                    | N.D.       |

N.D. = not detected
