# Supplementary material for: Optimization of culture conditions for the derivation and propagation of baboon (Papio anubis) induced pluripotent stem cells
Source: PubMed Central journal article supplement (PMC5832232; doi:10.1371/journal.pone.0193195), 2018-03-01
Supplement: pone.0193195.s008.pdf [file pone.0193195.s008.pdf]

S6 Table. No integration of Sendai virus in the genome of baboon iPSCs

| Sample           | Average Ct |
|------------------|------------|
| Positive Control |            |
| NANOG            | 29.88      |
| SEV              | 16.01      |
| KOS              | 27.09      |
| CMYK             | 22.51      |
| KLF4             | 23.50      |
| Baboon iPSCs     |            |
| NANOG            | 26.24      |
| SEV              | N.D.       |
| KOS              | N.D.       |
| CMYK             | N.D.       |
| KLF4             | N.D.       |

N.D. = not detected
