# Supplementary material for: Optimization of culture conditions for the derivation and propagation of baboon (Papio anubis) induced pluripotent stem cells
Source: PubMed Central journal article supplement (PMC5832232; doi:10.1371/journal.pone.0193195), 2018-03-01
Supplement: pone.0193195.s009.pdf [file pone.0193195.s009.pdf]

Ct values for technical reps S5 Table.

| Positive Control |          |          |          |          |          |
|------------------|----------|----------|----------|----------|----------|
|                  | HPRT1    | SEV      | KOS      | CMYK     | KLF4     |
| Technical Rep 1  | 23.88587 | 15.97409 | 25.90277 | 22.87782 | 21.95252 |
| Technical Rep 2  | 24.06782 | 15.88355 | 27.0027  | 22.99329 | 22.01403 |
| Technical Rep 3  | 23.69288 | 27.26427 | 26.35552 | 35.70842 | 22.1291  |
| Baboon iPSC      |          |          |          |          |          |
|                  | HPRT1    | SEV      | KOS      | CMYK     | KLF4     |
| Technical Rep 1  | 20.08551 | N.D.     | N.D.     | N.D.     | N.D.     |
| Technical Rep 2  | 19.69429 | N.D.     | N.D.     | N.D.     | N.D.     |
| Technical Rep 3  | 19.12404 | N.D.     | N.D.     | N.D.     | N.D.     |
| No Template      |          |          |          |          |          |
|                  | HPRT1    | SEV      | KOS      | CMYK     | KLF4     |
| Technical Rep 1  | N.D.     | N.D.     | N.D.     | N.D.     | N.D.     |
| Technical Rep 2  | N.D.     | N.D.     | N.D.     | N.D.     | N.D.     |
| Technical Rep 3  | N.D.     | N.D.     | N.D.     | N.D.     | N.D.     |

N.D. = not detected. A technical rep more than 3 cycles different from the average of the other two technical reps was considered an error and ignored.
