# Supplementary material for: Optimization of culture conditions for the derivation and propagation of baboon (Papio anubis) induced pluripotent stem cells
Source: PubMed Central journal article supplement (PMC5832232; doi:10.1371/journal.pone.0193195), 2018-03-01
Supplement: pone.0193195.s010.pdf [file pone.0193195.s010.pdf]

Ct values for technical reps S6 Table.

| Positive Control | NANOG    | SEV      | KOS      | CMYK     | KLF4     |
|------------------|----------|----------|----------|----------|----------|
| Technical Rep 1  | 29.39142 | 16.27601 | 26.88888 | 23.5176  | 23.01669 |
| Technical Rep 2  | 29.57634 | 15.82531 | 26.82784 | 23.55842 | 22.62257 |
| Technical Rep 3  | 30.66354 | 15.91514 | 27.56494 | 23.43613 | 21.91787 |

  

| Baboon iPSC Genomic DNA | NANOG    | SEV  | KOS  | CMYK | KLF4 |
|-------------------------|----------|------|------|------|------|
| Technical Rep 1         | 26.94623 | N.D. | N.D. | N.D. | N.D. |
| Technical Rep 2         | 25.77532 | N.D. | N.D. | N.D. | N.D. |
| Technical Rep 3         | 26.02016 | N.D. | N.D. | N.D. | N.D. |
