# Supplementary material for: Optimization of culture conditions for the derivation and propagation of baboon (Papio anubis) induced pluripotent stem cells
Source: PubMed Central journal article supplement (PMC5832232; doi:10.1371/journal.pone.0193195), 2018-03-01
Supplement: pone.0193195.s011.pdf [file pone.0193195.s011.pdf]

Ct values for S2 Figure

| Pluripotent     |          |          |          |          |          |          |          |          |
|-----------------|----------|----------|----------|----------|----------|----------|----------|----------|
|                 | HPRT     | OCT4     | SOX2     | NESTIN   | PAX6     | SOX17    | FOXA2    | T        |
| Technical Rep 1 | 18.91478 | 12.73304 | 18.2409  | 19.62981 | 28.82896 | 23.8229  | 22.9652  | 30.54389 |
| Technical Rep 2 | 18.2678  | 12.78222 | 17.45946 | 19.36095 | 28.85317 | 23.53583 | 22.42593 | 31.51155 |
| Technical Rep 3 | 18.06661 | 12.60524 | 17.83647 | 21.81421 | 28.4202  | 23.80138 | 22.71646 | 30.12008 |
| Ectoderm        |          |          |          |          |          |          |          |          |
|                 | HPRT     | OCT4     | SOX2     | NESTIN   | PAX6     | SOX17    | FOXA2    | T        |
| Technical Rep 1 | 19.86724 | 23.00622 | 16.99774 | 18.78698 | 18.01881 | 24.09042 | 24.42718 | 29.5016  |
| Technical Rep 2 | 19.04234 | 22.21484 | 16.70148 | 18.91803 | 18.12485 | 24.14227 | 24.71437 | 30.81405 |
| Technical Rep 3 | 18.93877 | 21.86814 | 17.12406 | 18.7114  | 17.80637 | 24.23329 | 24.81458 | 34.08133 |
| Mesoderm        |          |          |          |          |          |          |          |          |
|                 | HPRT     | OCT4     | SOX2     | NESTIN   | PAX6     | SOX17    | FOXA2    | T        |
| Technical Rep 1 | 18.84861 | 39.22387 | 22.96089 | 21.19192 | 29.67801 | 24.60119 | 25.37571 | 22.84632 |
| Technical Rep 2 | 17.79291 | 21.48611 | 22.99745 | 19.90143 | 27.15497 | 24.7211  | 24.83654 | 17.92066 |
| Technical Rep 3 | 17.90904 | 21.55362 | 23.63439 | 20.1985  | 26.81117 | 25.00024 | 25.23054 | 17.77508 |
|                 | 18.18352 | 21.51987 | 23.19757 | 20.43062 | 26.98307 | 24.77418 | 25.1476  | 17.84787 |
| Endoderm        |          |          |          |          |          |          |          |          |
|                 | HPRT     | OCT4     | SOX2     | NESTIN   | PAX6     | SOX17    | FOXA2    | T        |
| Technical Rep 1 | 19.11546 | 14.2584  | 19.63887 | 21.81421 | 29.52824 | 19.69242 | 18.29554 | 30.12008 |
| Technical Rep 2 | 19.64856 | 14.56878 | 19.47438 | 21.73194 | 28.00147 | 20.18413 | 18.47433 | 25.97022 |
| Technical Rep 3 | 19.22268 | 14.31677 | 19.29729 | 21.457   | 27.75807 | 19.82191 | 18.06479 | 25.96567 |

A technical rep more than 3 cycles different from the average of the other two technical reps was considered an error and ignored.
